# Supplementary material for: Aptasensors with palladium nanoparticle-modified hemin-containing metal–organic frameworks as the signal marker for detection of exosomes
Source: Royal Society of Chemistry journal article supplement (doi:10.1039/d3an00723e), 2023-01-01
Supplement: d3an00723e1.pdf [file d3an00723e1.pdf]

# **Aptasensors with palladium nanoparticles-modified hemin-containing metal-organic frameworks as signal marker for detection of exosomes**

Wei Li,<sup>a</sup> Huili Wang,<sup>a</sup> Xinxin Ying,<sup>c</sup> Zhen Liang,<sup>a</sup> Jianna Li,<sup>b,\*</sup> Xiangjuan Chen,<sup>c</sup> Lei Su<sup>a,\*</sup>, Xueji Zhang<sup>a,\*</sup>

<sup>a</sup> School of Biomedical Engineering, International Health Science Innovation Center, Shenzhen Key Laboratory of Nano-Biosensing Technology, Marshall Laboratory of Biomedical Engineering, Shenzhen University Medical School, Shenzhen University, Shenzhen 518055, Guangzhou, China.  
E-mail address: [sulei@szu.edu.cn](mailto:sulei@szu.edu.cn); [zhangxueji@szu.edu.cn](mailto:zhangxueji@szu.edu.cn).

<sup>b</sup> School of Basic Medical Sciences, Shenzhen University Medical School, Shenzhen University, Shenzhen 518055, Guangzhou, China. E-mail address: [lijianna@szu.edu.cn](mailto:lijianna@szu.edu.cn).

<sup>c</sup> Department of Obstetrics and Gynecology, Shenzhen University General Hospital, Shenzhen, Guangdong Province, China

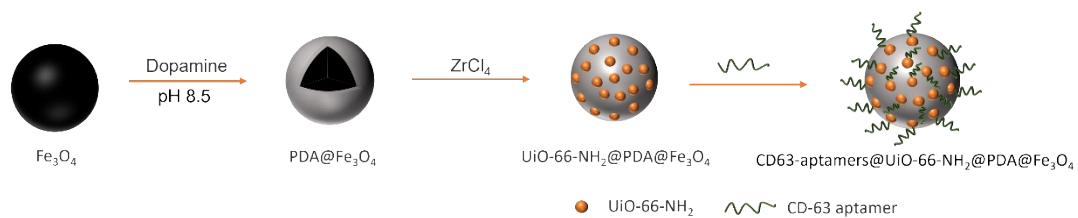

**Scheme S1.** Schematic illustration of the synthesis of the CD63-aptamers@UiO-66-NH<sub>2</sub>@PDA@Fe<sub>3</sub>O<sub>4</sub> capture probe.

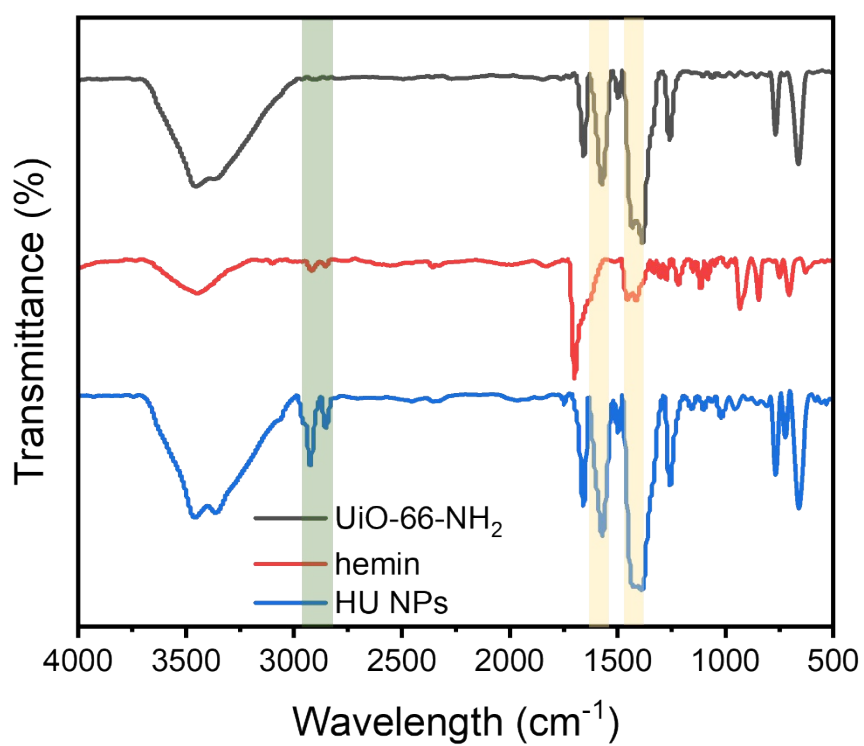

**Fig. S1.** FT-IR spectra of UiO-66-NH<sub>2</sub> (black line), hemin (red line) and the HU NPs (blue line).

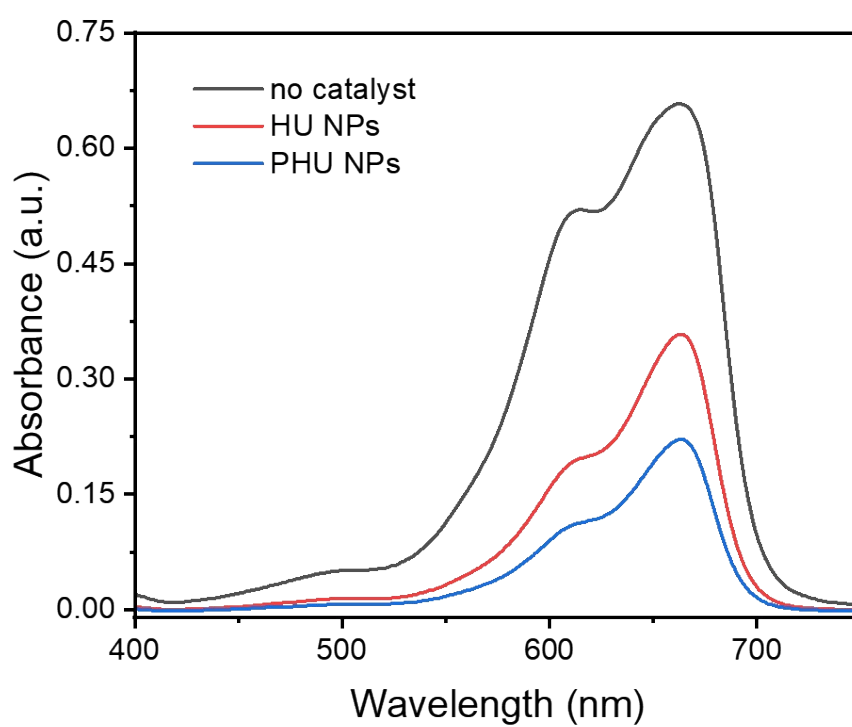

**Fig. S2.** UV-vis absorption spectra of MB (black line) with its oxidation to indicate  $\cdot\text{OH}$  production via  $\text{H}_2\text{O}_2$  decomposition by the HU NPs (red line) and the PHU NPs (blue line), respectively.

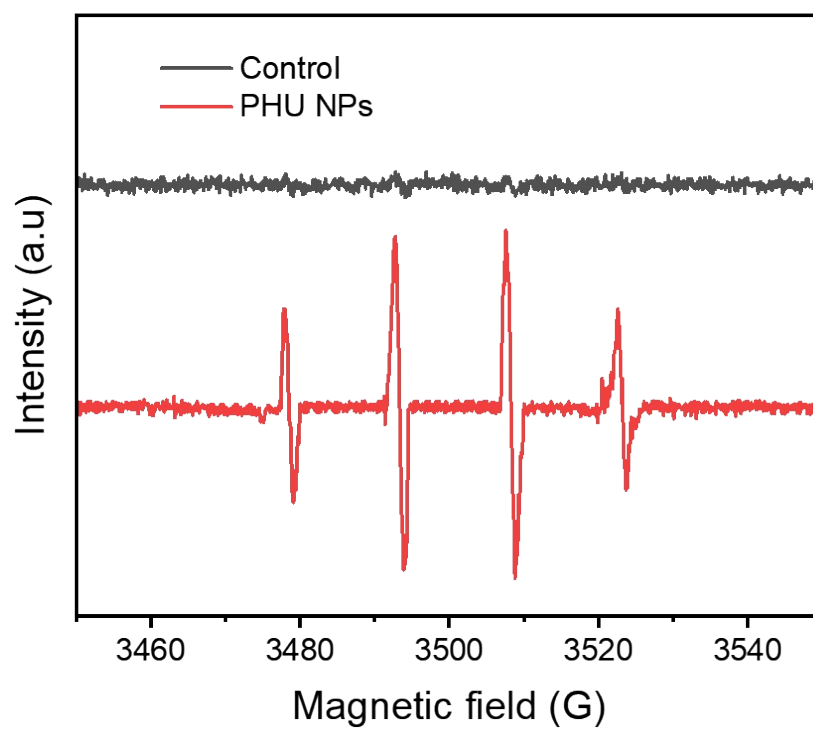

**Fig. S3.** Typical spin-adduct EPR of  $\cdot\text{OH}$  of DMPO in phosphate buffer at pH 7.4.

**Table S1** Comparison of the apparent Michaelis-Menten constant ( $K_m$ ) and maximum reaction rate ( $V_{max}$ ).

| Catalysts                                      | $K_m$ (mM) |                               | $V_{max}$ ( $10^{-8}$ M/s) |                               |
|------------------------------------------------|------------|-------------------------------|----------------------------|-------------------------------|
|                                                | TMB        | H <sub>2</sub> O <sub>2</sub> | TMB                        | H <sub>2</sub> O <sub>2</sub> |
| Fe <sub>3</sub> O <sub>4</sub> <sup>1</sup>    | 0.098      | 154.0                         | 3.440                      | 9.780                         |
| HRP <sup>1</sup>                               | 0.434      | 3.700                         | 10.00                      | 8.710                         |
| Hemin@MIL-101(Al)-NH <sub>2</sub> <sup>2</sup> | 0.068      | 10.90                         | 6.070                      | 8.980                         |
| PHU NPs, this work                             | 0.11       | 0.09                          | 12.05                      | 7.65                          |

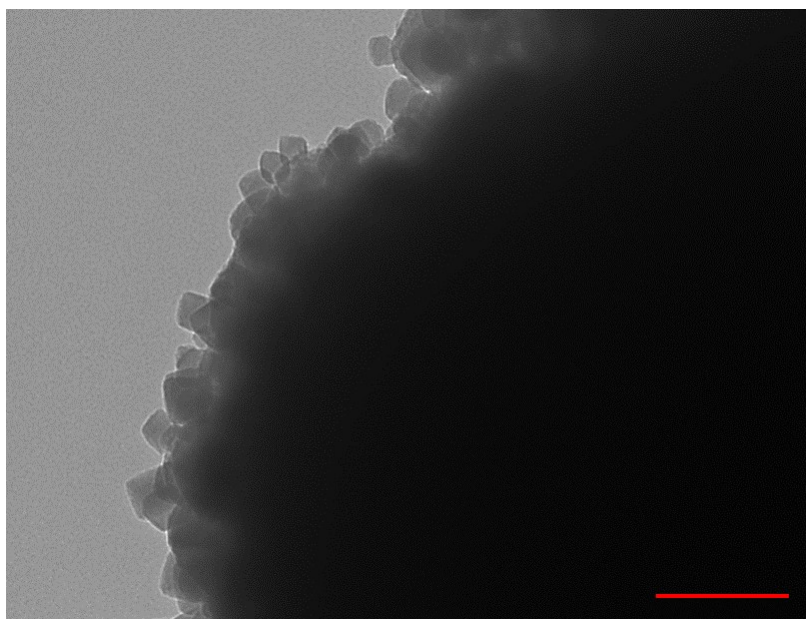

**Fig. S4.** Typical TEM image of the aptamer@UiO-66-NH<sub>2</sub>@PDA@Fe<sub>3</sub>O<sub>4</sub> particles. Scale bar: 200 nm.

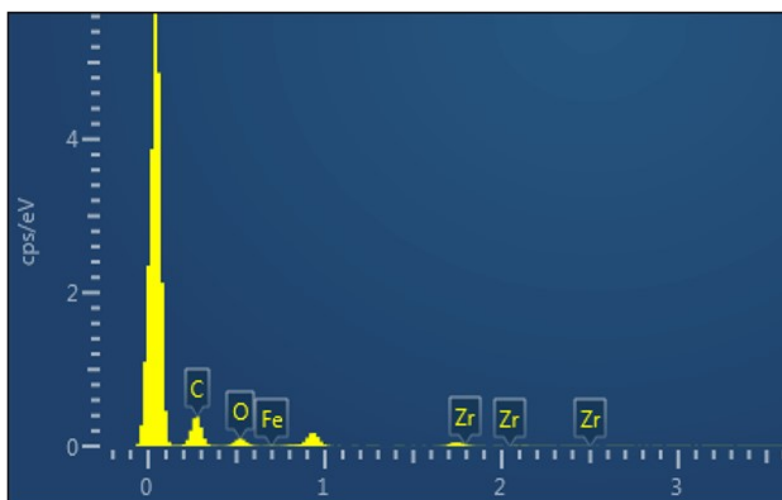

**Fig. S5.** Energy-dispersive X-ray (EDX) elemental mapping analysis of the aptamer@UiO-66-NH<sub>2</sub>@PDA@Fe<sub>3</sub>O<sub>4</sub> particles.



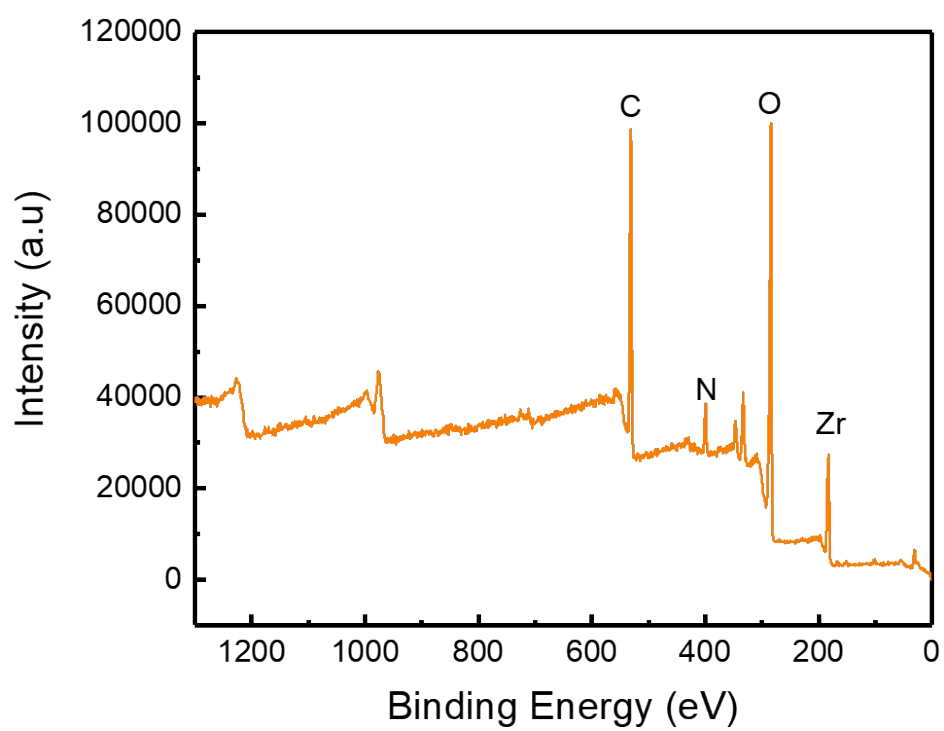

**Fig. S6.** XPS of the aptamer@UiO-66-NH<sub>2</sub>@PDA@Fe<sub>3</sub>O<sub>4</sub> particles.

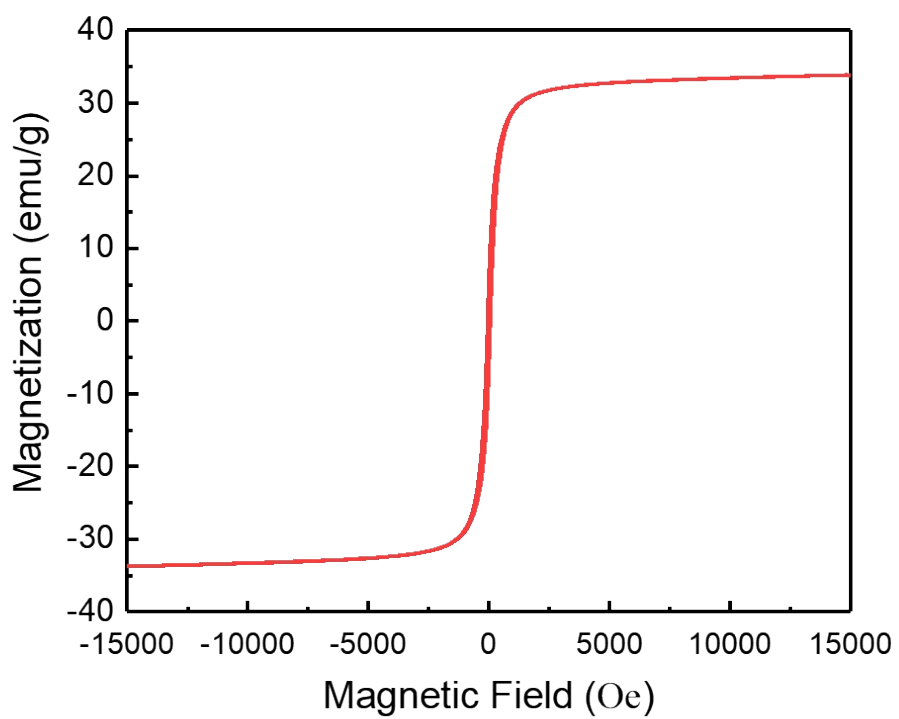

**Fig. S7.** Magnetic hysteresis curves of the aptamer@UiO-66-NH<sub>2</sub>@PDA@Fe<sub>3</sub>O<sub>4</sub> particles.

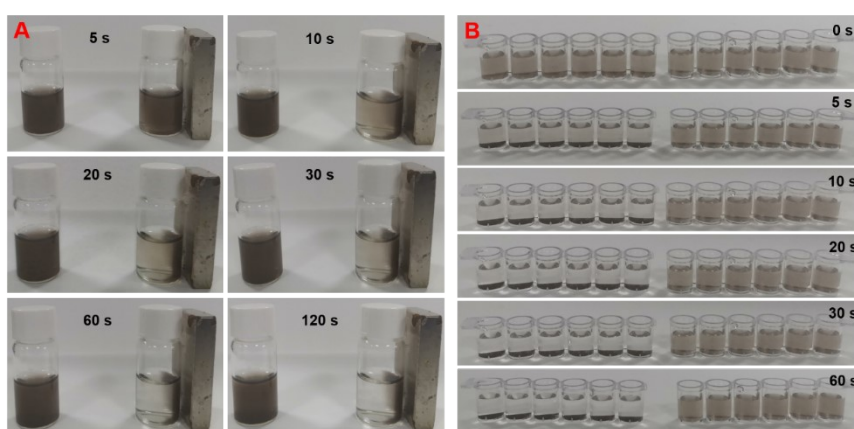

**Fig. S8.** Separation performance of the aptamer@UiO-66-NH<sub>2</sub>@PDA@Fe<sub>3</sub>O<sub>4</sub> particles under a magnet in a glass bottle (A) and in 96-well plate (B).

**Table S2.** Comparison of LOD and detection time of currently available methods for the colorimetric detection of exosomes.

| Analytical method                                         | LOD (particles/ $\mu\text{L}$ ) | Linear range (particles/ $\mu\text{L}$ ) | References |
|-----------------------------------------------------------|---------------------------------|------------------------------------------|------------|
| g-C <sub>3</sub> N <sub>4</sub> nanozyme<br>single-walled | 1.352 $\times 10^6$             | 0.19 $\times 10^7$ -3.38 $\times 10^7$   | 3          |
| carbon nanotubes<br>nanozyme                              | 5.2 $\times 10^5$               | 1.84 $\times 10^6$ -2.21 $\times 10^7$   | 4          |
| TdT-aided signal<br>amplification                         | 6.7 $\times 10^3$               | 9.75 $\times 10^3$ -1.95 $\times 10^6$   | 5          |
| HRP-accelerated<br>dopamine<br>polymerization             | 7.7                             | 1-10 <sup>8</sup>                        | 6          |
| CuCo <sub>2</sub> O <sub>4</sub> nanozyme                 | 4.5 $\times 10^3$               | 5.6 $\times 10^4$ - 8.9 $\times 10^5$    | 7          |
| HRP-GNPs                                                  | 100                             |                                          | 8          |
| Dual functional Zr-<br>MOF nanozyme                       | 82.6                            | 4.28 $\times 10^2$ - 4.28 $\times 10^5$  | This work  |

TdT: terminal deoxynucleotidyl transferase. HRP-GNPs: HRP modified gold nanoparticles.

#### References:

1. Y. Wu, Y. Ma, G. Xu, F. Wei, Y. Ma, Q. Song, X. Wang, T. Tang, Y. Song, M. Shi, X. Xu and Q. Hu, *Sensors and Actuators B-Chemical*, **2017**, *249*, 195-202.
2. F.-X. Qin, S.-Y. Jia, F.-F. Wang, S.-H. Wu, J. Song and Y. Liu, *Catalysis Science & Technology*, **2013**, *3*, 2761-2768.
3. Y.-M. Wang, J.-W. Liu, G. B. Adkins, W. Shen, M. P. Trinh, L.-Y. Duan, J.-H. Jiang and W. Zhong, *Analytical Chemistry*, **2017**, *89*, 12327-12333.
4. Y. Xia, M. Liu, L. Wang, A. Yan, W. He, M. Chen, J. Lan, J. Xu, L. Guan and J. Chen, *Biosensors & Bioelectronics*, **2017**, *92*, 8-15.
5. Z. Huang, Q. Lin, X. Ye, B. Yang, R. Zhang, H. Chen, W. Weng and J. Kong, *Talanta*, **2020**, *218*.
6. L. Xu, R. Chopdat, D. Li and K. T. Al-Jamal, *Biosensors & Bioelectronics*, **2020**, *169*.
7. Y. Zhang, Q. Su, D. Song, J. Fan and Z. Xu, *Analytica Chimica Acta*, **2021**, *1145*, 9-16.
8. C. Li, M. Zhou, H. Wang, J. Wang and L. Huang, *Talanta*, **2022**, *245*.

**Table S3.** Comparison with commercial ELISA kits

| Products                                         |  |  |  |  | LOD<br>(particales/ $\mu$ L ) | Linear range (particales/ $\mu$ L )   |
|--------------------------------------------------|--|--|--|--|-------------------------------|---------------------------------------|
| Human Total Exosome Capture & Quantification Kit |  |  |  |  | $1 \times 10^5$               | $6.09 \times 10^5 - 1.95 \times 10^6$ |
| This work                                        |  |  |  |  | 86.2                          | $4.28 \times 10^2 - 4.28 \times 10^5$ |

- not found
